# Supplementary material
Source: publisher figshare collection journal article supplement (https://acs.figshare.com/ndownloader/files/3872914)
Supplement: Supplementary file 1 [file 3872914]

# Reduction Sensitive Poly(L-glutamic acid) (PGA)-Protein Conjugates designed for Polymer Masked-Unmasked Protein Therapy

*Marina Talelli\*<sup>†</sup>, María J. Vicent\**

Polymer Therapeutics Lab., Centro de Investigación Príncipe Felipe (CIPF), Av.

Eduardo Primo Yúfera 3, 46012Valencia, Spai

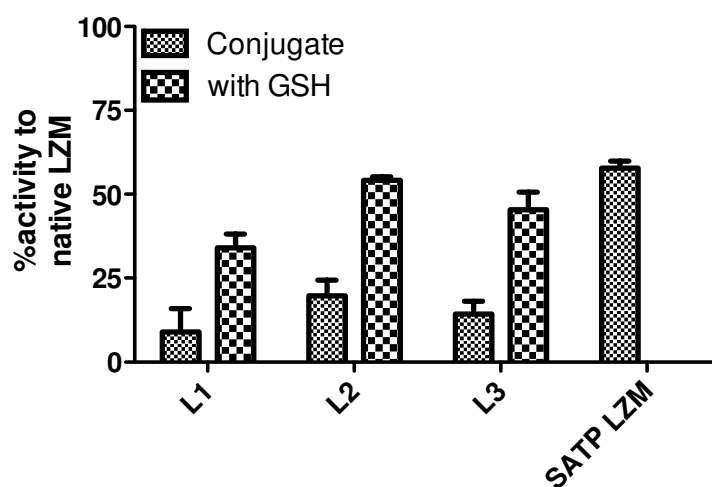

**Figure S1.** Lysozyme activity of the conjugates before and after treatment with 10 mM GSH for 2 hours at 37 °C, as compared to the activity of native lysozyme. Data represented as mean  $\pm$  standard deviation (n=3).

\*Co-corresponding authors: M. Talelli. Tel. +34 603296800; Email address: [matalelli@cnb.csic.es](mailto:matalelli@cnb.csic.es) and M.J. Vicent, Tel.: +34 963289680; Fax: +34 963289701.

Email address: [mjvicent@cipf.es](mailto:mjvicent@cipf.es)

†Current address: Department of Immunology and Oncology and NanoBiomedicine Initiative, National Centre of Biotechnology (CNB)/CSIC, Darwin 3, Cantoblanco, 28049 Madrid, Spain
